# Supplementary material for: Akr1d1-/- mice have a sexually dimorphic metabolic phenotype with reduced fat mass, increased insulin sensitivity and hypertriglyceridemia in males
Source: bioRxiv or medRxiv preprint supplement (doi:10.1101/2021.02.02.429227), 2021-02-02

**Fig.S1**

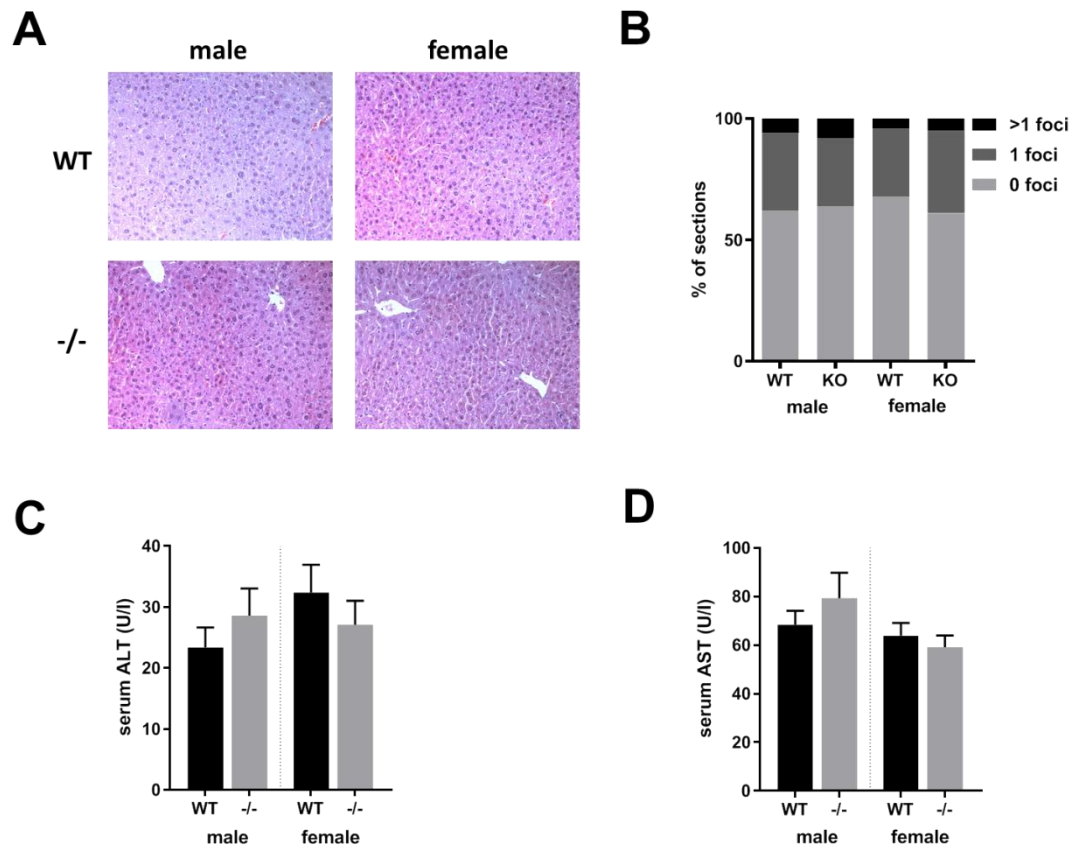

**Fig.S2****A**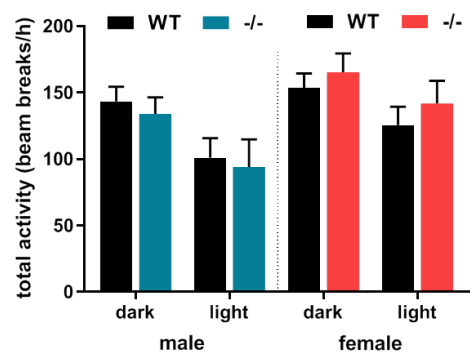**B**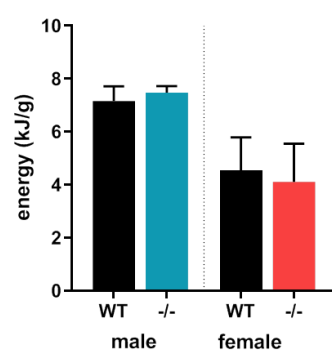**C**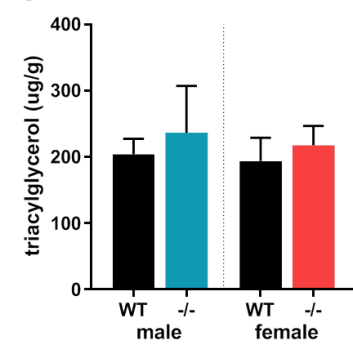**D**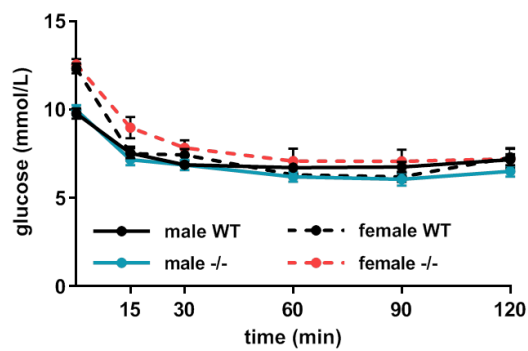**E**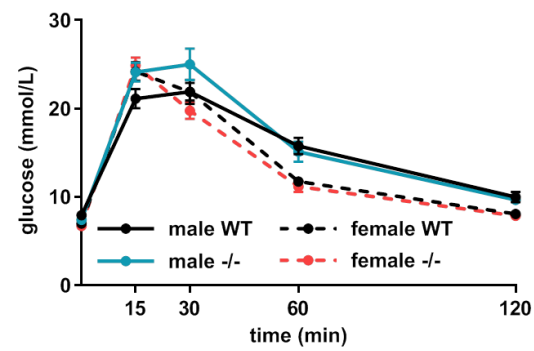**F**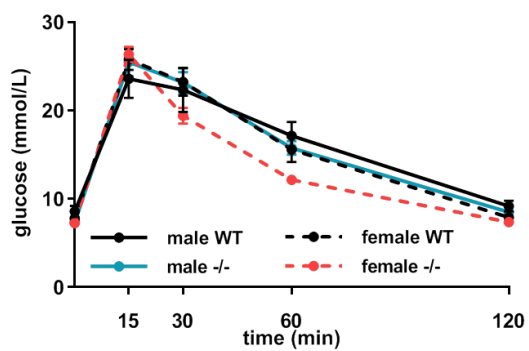**G**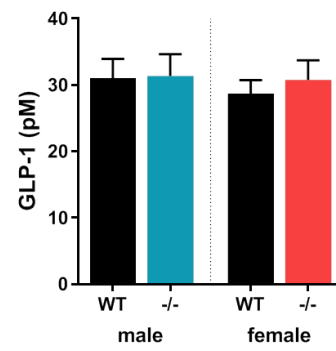**H**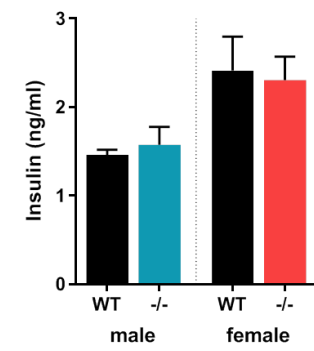

**Fig.S3**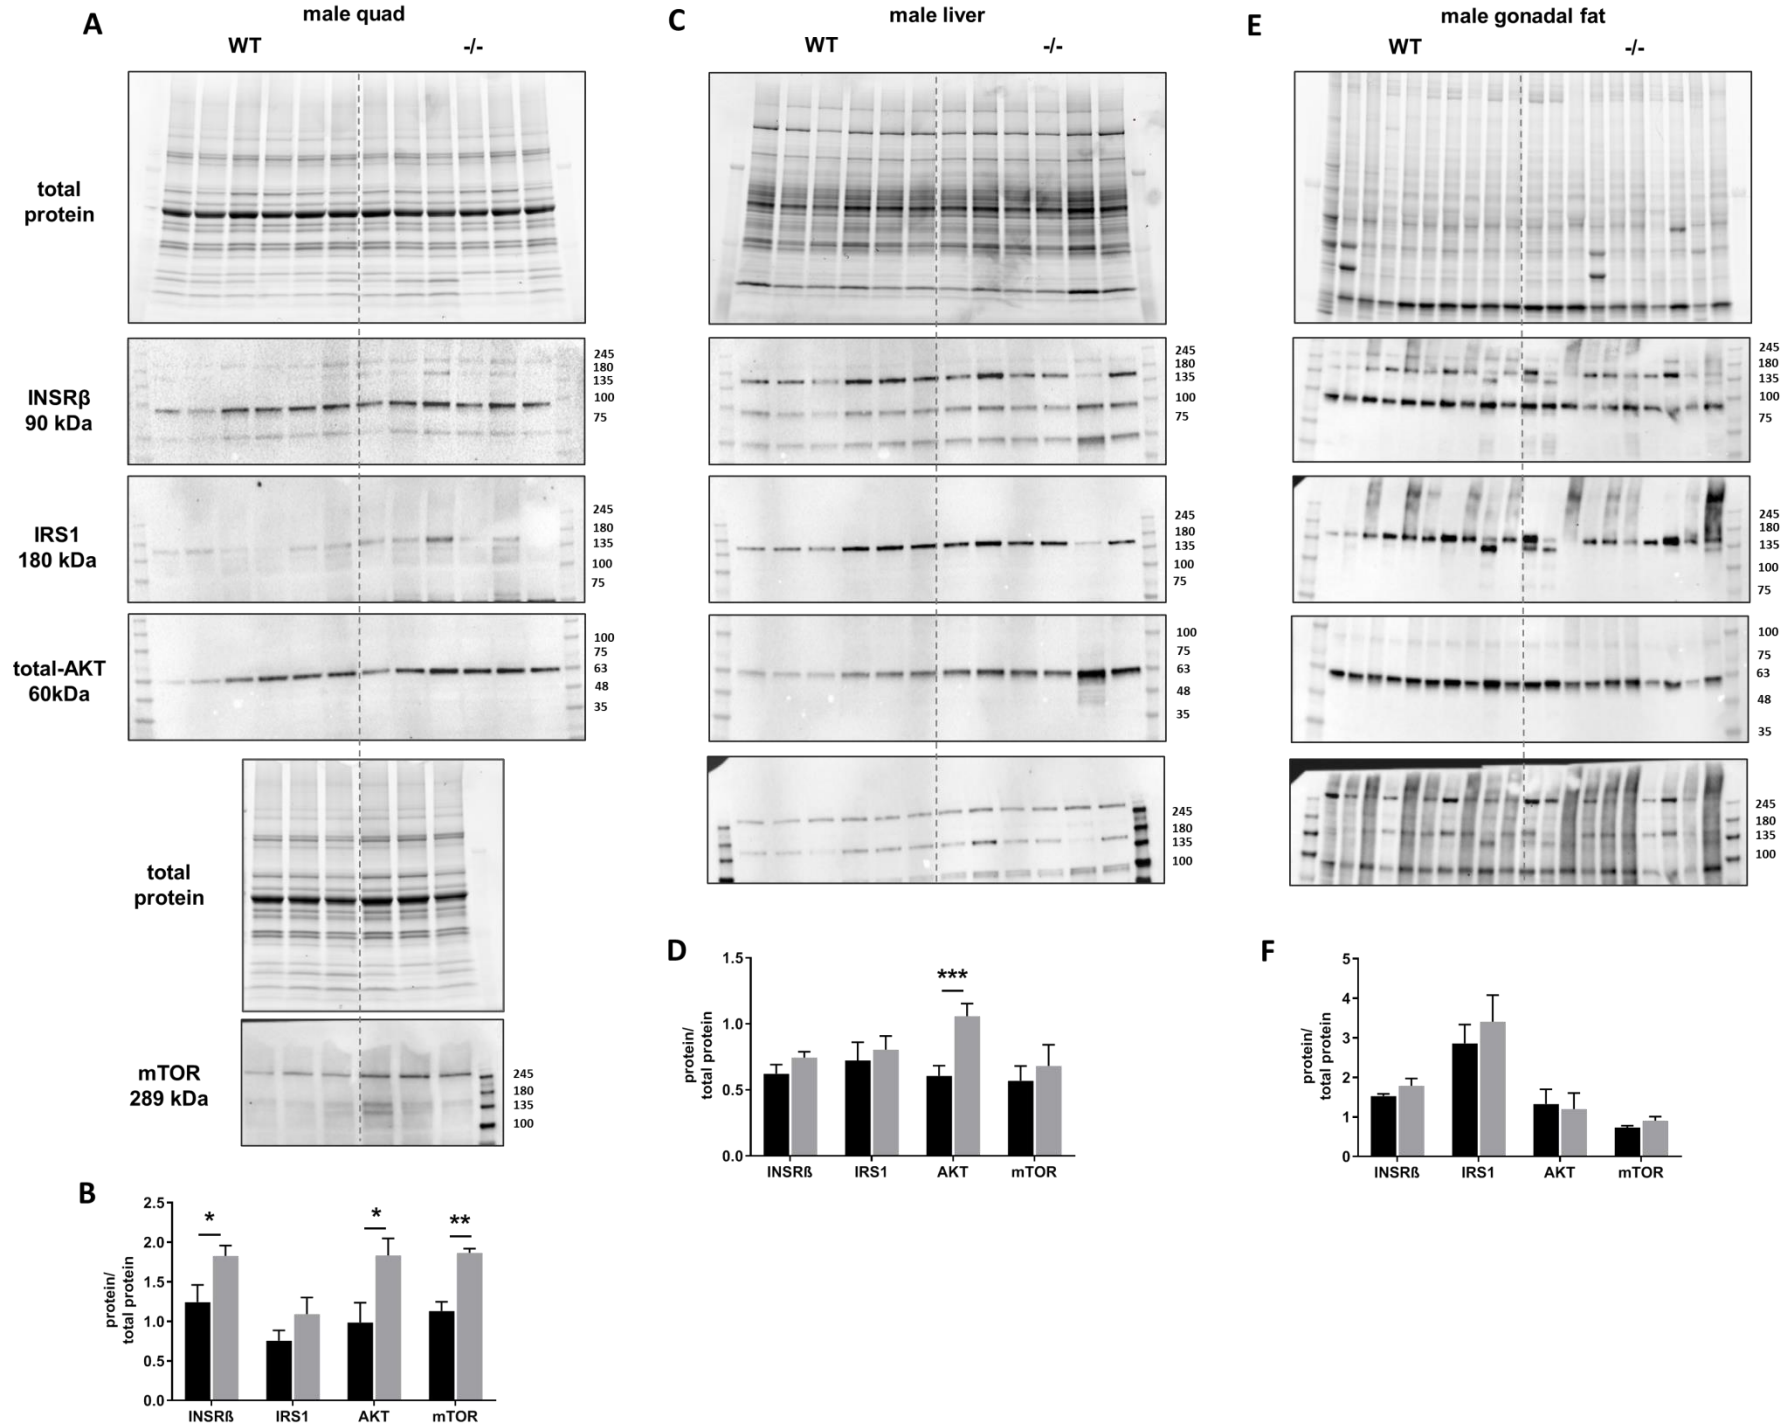

**Fig.S4**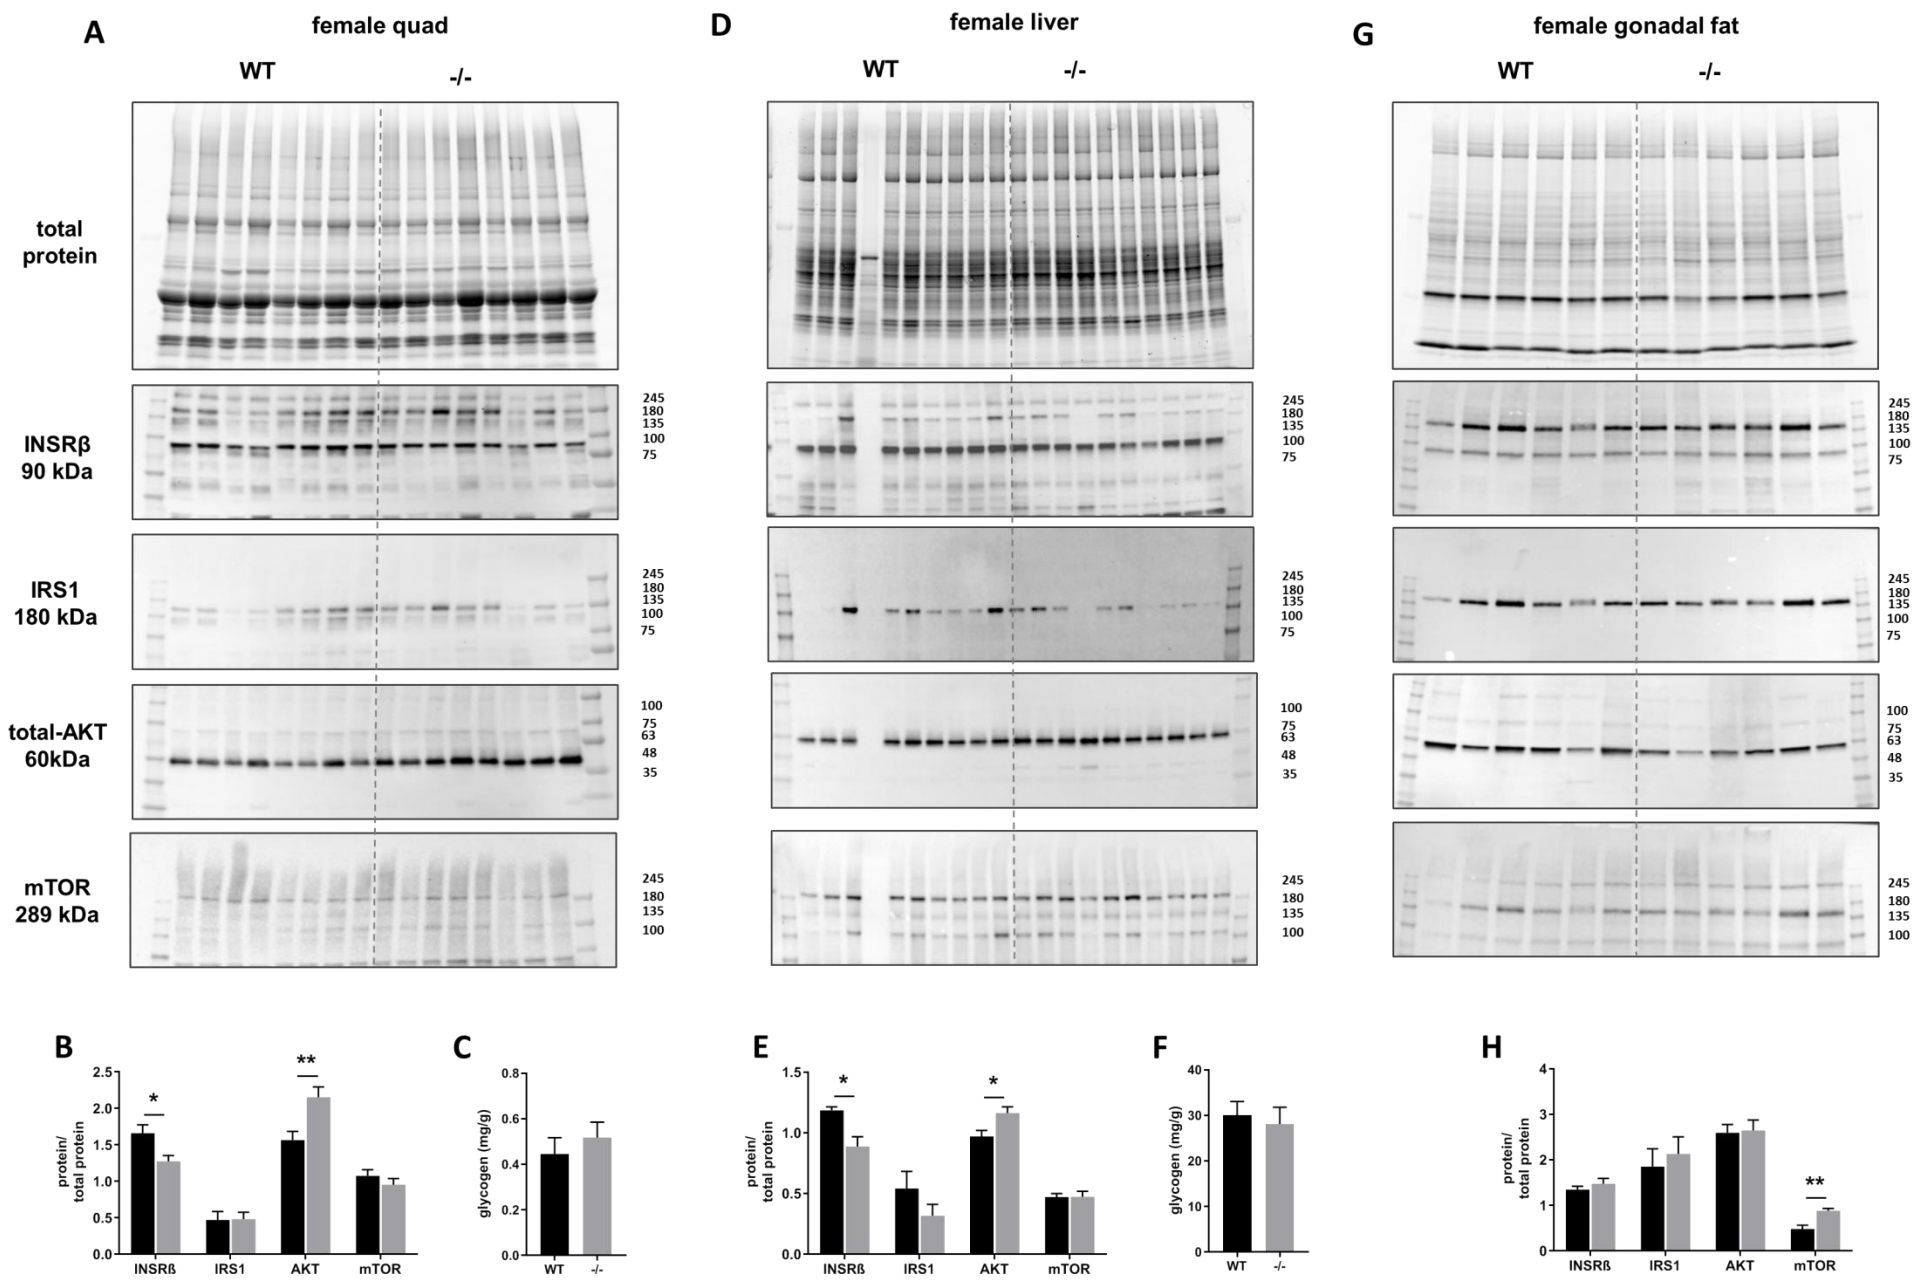

**Fig.S5**

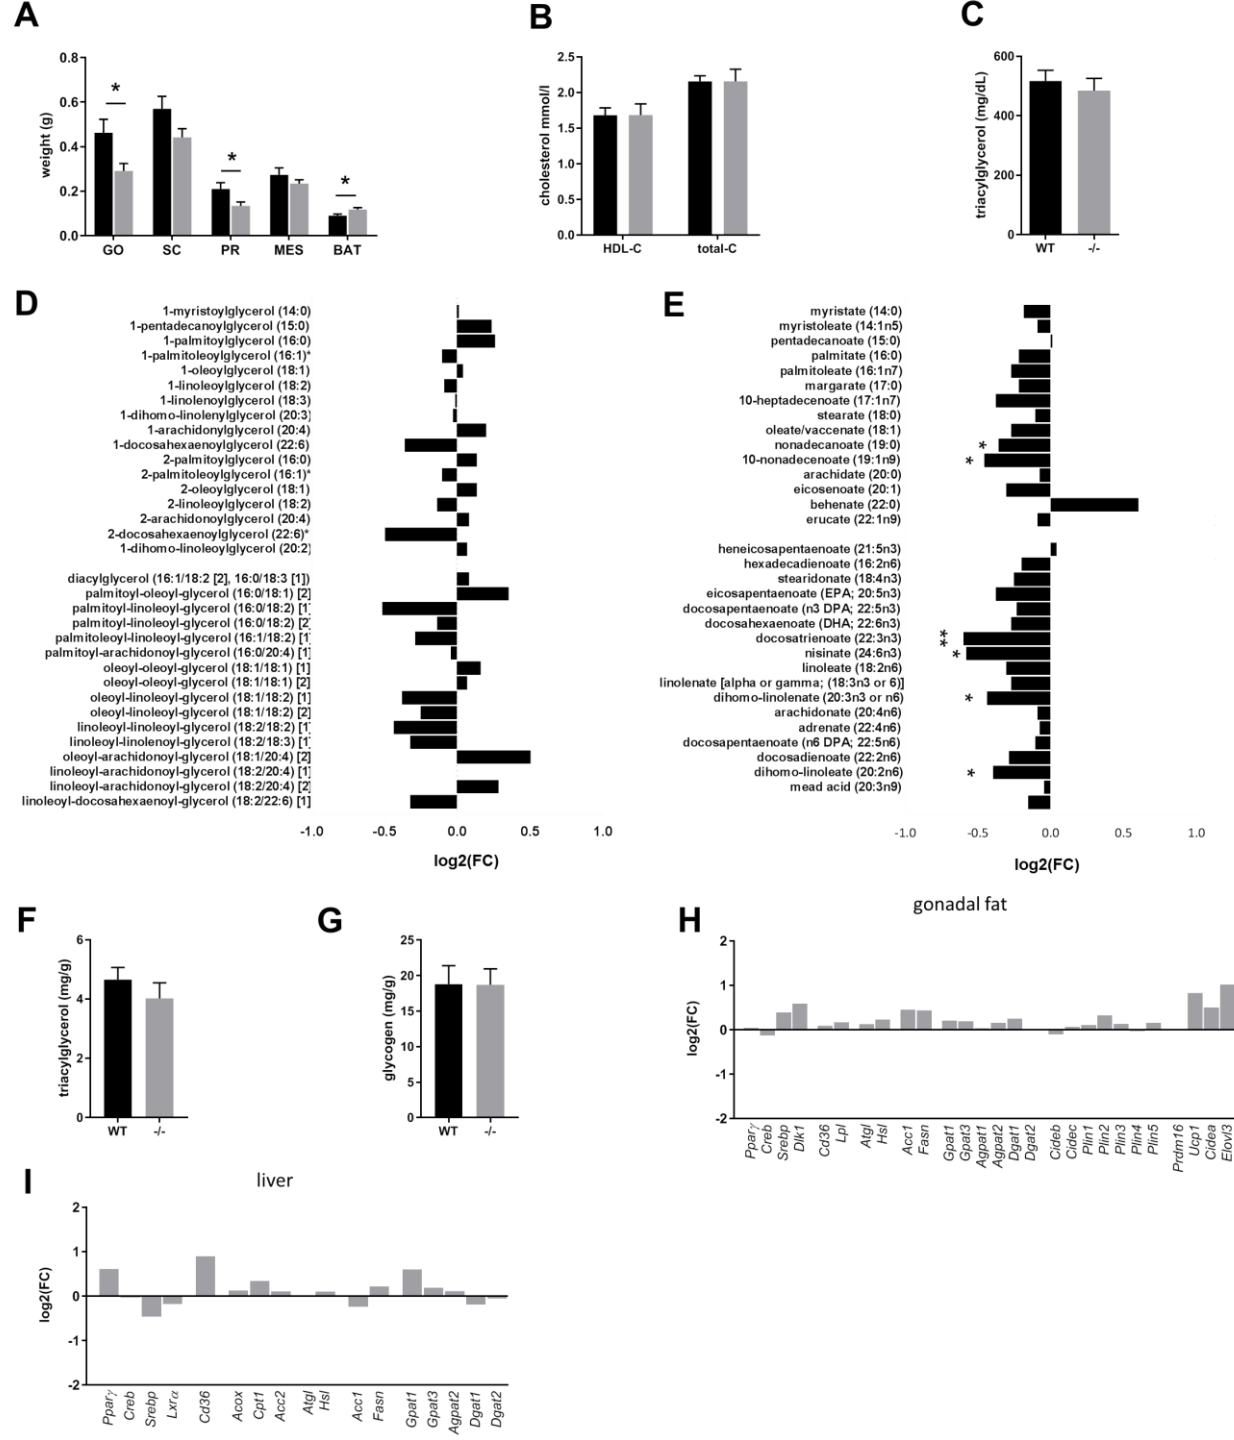

Supplement: Supplementary file [file media-1.pdf]
