# Supplementary material for: Akr1d1-/- mice have a sexually dimorphic metabolic phenotype with reduced fat mass, increased insulin sensitivity and hypertriglyceridemia in males
Source: bioRxiv or medRxiv preprint supplement (doi:10.1101/2021.02.02.429227), 2021-02-02
Supplement: Supplementary file [file media-2.pdf]

|                         | liver (pmol/mg) |                              |            |                              | serum (nM) |                              |           |                              |
|-------------------------|-----------------|------------------------------|------------|------------------------------|------------|------------------------------|-----------|------------------------------|
|                         | male            |                              | female     |                              | male       |                              | female    |                              |
|                         | WT              | <i>Akr1d1</i> <sup>-/-</sup> | WT         | <i>Akr1d1</i> <sup>-/-</sup> | WT         | <i>Akr1d1</i> <sup>-/-</sup> | WT        | <i>Akr1d1</i> <sup>-/-</sup> |
| <b>CA</b>               | 5.23±1.88       | 0.12±0.06                    | 6.26±2.58  | 1.22±0.53                    | 365±112    | 49.1.6±20.4                  | 837±177   | 246±90                       |
| <b>T-CA</b>             | 78.1±13.8       | 7.55±1.85 <sup>‡</sup>       | 115±16.5   | 33.3±9.26 <sup>***</sup>     | 92.3±16.3  | 5.1±5.1 <sup>‡</sup>         | 417±47    | 143±24 <sup>‡</sup>          |
| <b>G-CA</b>             | 0.47±0.09       | 0.01±0.01 <sup>***</sup>     | 0.47±0.08  | 0.21±0.03                    | ND         | ND                           | ND        | ND                           |
| <b>CDCA</b>             | 0.17±0.03       | ND <sup>‡</sup>              | 0.09±0.02  | ND                           | 31.2±4.8   | 19.2±2.3                     | 33.3±4.3  | 18.7±1.9                     |
| <b>T-CDCA</b>           | 7.32±1.66       | 0.62±0.13 <sup>**</sup>      | 9.39±1.45  | 1.59±0.39 <sup>‡</sup>       | 9.09±1.21  | 0.69±0.69 <sup>***</sup>     | 18.0±2.8  | 0.68±0.47 <sup>**</sup>      |
| <b>G-CDCA</b>           | ND              | ND                           | ND         | ND                           | 6.80±1.50  | 9.83±2.30                    | 11.2±1.5  | 9.95±1.81                    |
| <b>α-MCA</b>            | 0.97±0.30       | 0.03±0.02 <sup>*</sup>       | 0.49±0.13  | 0.07±0.04                    | 20.1±10.0  | 1.49±1.49                    | 42.5±10.9 | 4.35±2.82 <sup>*</sup>       |
| <b>T-α-MCA</b>          | 24.8±4.9        | 2.40±0.58 <sup>***</sup>     | 27.6±4.0   | 4.89±1.32                    | 46.7±10.4  | 7.9±1.7 <sup>**</sup>        | 107±13    | ND <sup>***</sup>            |
| <b>β-MCA</b>            | 4.87±1.20       | 0.85±0.24                    | 1.62±0.35  | 0.54±0.14                    | 111±39     | 24.1±8.1                     | 450±114   | 147±47                       |
| <b>T-β-MCA</b>          | 74.9±13.3       | 18.4±3.9 <sup>**</sup>       | 97.0±11.3  | 42.7±8.2 <sup>*</sup>        | 56.4±13.9  | 11.36±3.7 <sup>*</sup>       | 169±15    | 98±37                        |
| <b>ω-MCA</b>            | 1.03±0.22       | 0.24±0.06                    | 0.61±0.19  | 0.21±0.06                    | 129±33     | 31.3±6.4                     | 398±79    | 113±32 <sup>*</sup>          |
| <b>T-ω-MCA</b>          | 60.3±12.4       | 20.7±4.5                     | 67.2±9.97  | 32.8±6.9                     | 190±27     | 62.2±11.8 <sup>**</sup>      | 560±38    | 246±40 <sup>**</sup>         |
| <b>DCA</b>              | 0.64±0.20       | ND                           | 0.28±0.03  | 0.02±0.02 <sup>***</sup>     | 443±77     | 37.4±15.4 <sup>‡</sup>       | 1076±131  | 96.4±24.4 <sup>***</sup>     |
| <b>T-DCA</b>            | 15.4±2.2        | 0.77±0.18 <sup>***</sup>     | 20.0±2.6   | 2.35±0.66 <sup>**</sup>      | 58.7±9.9   | 1.83±1.5 <sup>***</sup>      | 156±22    | 3.39±2.02 <sup>***</sup>     |
| <b>LCA</b>              | ND              | ND                           | ND         | ND                           | 77.5±3.7   | 68.7±5.8                     | 65.8±3.1  | 65.5±4.8                     |
| <b>T-LCA</b>            | 1.47±0.07       | 0.99±0.24                    | 1.85±0.13  | 1.94±0.22                    | 0.65±0.16  | 1.21±1.04                    | 0.69±0.27 | 1.35±0.38                    |
| <b>G-LCA</b>            | ND              | ND                           | ND         | ND                           | ND         | ND                           | ND        | ND                           |
| <b>UDCA</b>             | 0.36±0.10       | 0.28±0.08                    | 0.23±0.10  | 0.14±0.04                    | 66.2±20.2  | 45.5±5.1                     | 177±73    | 33.6±5.6                     |
| <b>T-UDCA</b>           | 10.1±2.1        | 7.49±1.23                    | 12.8±2.01  | 7.77±1.94                    | 42.6±3.75  | 20.0±3.4 <sup>**</sup>       | 94.2±7.6  | 61.0±11.0                    |
| <b>G-UDCA</b>           | 0.01±0.004      | ND                           | 0.01±0.004 | ND                           | 5.62±0.2   | 6.35±0.64                    | 6.04±0.15 | 6.23±0.15                    |
| <b>HDCA</b>             | 0.62±0.01       | 2.28±0.44 <sup>**</sup>      | 0.08±0.03  | 0.18±0.05                    | 54.9±18.2  | 28.4±5.1                     | 125±21    | 5.38±2.13 <sup>***</sup>     |
| <b>7-oxo-DCA</b>        | ND              | ND                           | 0.09±0.05  | 0.03±0.02                    | 20.1±13.8  | 40.0±11.3                    | 25.6±11.4 | 140±101                      |
| <b>T-7-oxo-LCA</b>      | 0.10±0.04       | ND                           | 0.23±0.06  | 0.04±0.03                    | ND         | ND                           | ND        | ND                           |
| <b>12α-hydroxyl</b>     | 99.7±17.5       | 8.44±2.04                    | 142±20     | 37.1±10.3                    | 959±180    | 93±44                        | 2486±299  | 489±113                      |
| <b>non-12α-hydroxyl</b> | 187±34          | 55.3±10.4                    | 219±27     | 92.9±18.5                    | 868±178    | 379±44                       | 2282±305  | 952±183                      |
