# Supplementary material for: Akr1d1-/- mice have a sexually dimorphic metabolic phenotype with reduced fat mass, increased insulin sensitivity and hypertriglyceridemia in males
Source: bioRxiv or medRxiv preprint supplement (doi:10.1101/2021.02.02.429227), 2021-02-02
Supplement: Supplementary file [file media-3.pdf]

|                | male liver                |                              | female liver              |                              |
|----------------|---------------------------|------------------------------|---------------------------|------------------------------|
|                | relative expression ratio |                              | relative expression ratio |                              |
|                | WT                        | <i>Akr1d1</i> <sup>-/-</sup> | WT                        | <i>Akr1d1</i> <sup>-/-</sup> |
| <i>Cyp7a1</i>  | 0.37±0.08                 | 0.25±0.08                    | 1.62±0.41                 | 2.51±0.80                    |
| <i>Cyp8b1</i>  | 0.93±0.10                 | 0.69±0.05                    | 0.60±0.15                 | 1.34±0.21*                   |
| <i>Cyp3a11</i> | 0.59±0.11                 | 0.63±0.22                    | 1.61±0.20                 | 2.18±0.28*                   |
| <i>Sult2a7</i> | 0.25±0.09                 | 0.21±0.08                    | 0.68±0.14                 | 1.23±0.15*                   |
| <i>Insrβ</i>   | 1.32±0.24                 | 1.45±0.32                    | 1.18±0.19                 | 1.02±0.10                    |
| <i>Irs1</i>    | 1.14±0.08                 | 1.07±0.20                    | 1.21±0.32                 | 1.33±0.26                    |
| <i>Pi3K</i>    | 0.48±0.06                 | 0.50±0.10                    | 0.22±0.03                 | 0.30±0.32                    |
| <i>Akt1</i>    | 0.83±0.21                 | 0.95±0.15                    | 0.88±0.42                 | 0.98±0.21                    |
| <i>mTor</i>    | 0.38±0.26                 | 2.92±0.49 <sup>φ</sup>       | 0.62±0.08                 | 0.75±0.17                    |
| <i>Pparγ</i>   | 0.92±0.13                 | 0.60±0.07*                   | 0.32±0.35                 | 0.39±0.34                    |
| <i>Cd36</i>    | 0.73±0.06                 | 0.42±0.10*                   | 0.64±0.08                 | 0.67±0.09                    |
| <i>Fasn</i>    | 0.47±0.05                 | 0.31±0.15                    | 0.55±0.09                 | 0.43±0.13                    |
| <i>Gpat1</i>   | 0.84±0.17                 | 0.32±0.43                    | 0.73±0.14                 | 0.84±0.32                    |
| <i>Gpat3</i>   | 0.79±0.14                 | 0.32±0.09*                   | 0.61±0.14                 | 0.66±0.17                    |
| <i>Cidec</i>   | 1.32±0.20                 | 0.69±0.13*                   | 1.02±0.29                 | 1.14±0.36                    |
| <i>Plin4</i>   | 0.63±0.09                 | 0.24±0.16*                   | 0.59±0.25                 | 0.48±0.10                    |
|                | male quad                 |                              | female quad               |                              |
|                | relative expression ratio |                              | relative expression ratio |                              |
|                | WT                        | <i>Akr1d1</i> <sup>-/-</sup> | WT                        | <i>Akr1d1</i> <sup>-/-</sup> |
| <i>Insrβ</i>   | 1.18±0.07                 | 2.51±0.80                    | 1.13±0.07                 | 1.00±0.05                    |
| <i>Irs1</i>    | 0.65±0.04                 | 1.34±0.21*                   | 0.98±0.09                 | 0.93±0.07                    |
| <i>Pi3K</i>    | 0.64±0.06                 | 1.02±0.10                    | 1.20±0.08                 | 0.96±0.09 <sup>0.06</sup>    |
| <i>Akt1</i>    | 1.15±0.08                 | 1.33±0.26                    | 1.14±0.07                 | 0.98±0.06 <sup>0.09</sup>    |
| <i>mTor</i>    | 0.43±0.10                 | 0.30±0.32                    | 0.37±0.08                 | 0.53±0.13                    |
| <i>Cd36</i>    | 0.55±0.05                 | 0.98±0.21                    | 0.49±0.04                 | 0.37±0.04 <sup>0.06</sup>    |
| <i>Acc2</i>    | 1.09±0.08                 | 0.75±0.17                    | 1.10±0.07                 | 0.96±0.10                    |
| <i>Cpt1</i>    | 1.07±0.06                 | 0.39±0.34                    | 1.16±0.10                 | 1.07±0.07                    |
| <i>Acc1</i>    | 0.80±0.21                 | 0.67±0.09                    | 0.42±0.07                 | 0.39±0.06                    |
| <i>Fasn</i>    | 0.99±0.25                 | 0.43±0.13                    | 0.37±0.08                 | 0.53±0.13                    |
| <i>Dgat1</i>   | 1.34±0.22                 | 0.84±0.32                    | 0.80±0.13                 | 0.86±0.09                    |
| <i>Gpam</i>    | 1.15±0.07                 | 0.66±0.17                    | 1.00±0.10                 | 0.87±0.09                    |
| <i>Pdk4</i>    | 0.56±0.08                 | 1.14±0.36                    | 0.56±0.08                 | 0.67±0.11                    |
