# Supplementary material for: Akr1d1-/- mice have a sexually dimorphic metabolic phenotype with reduced fat mass, increased insulin sensitivity and hypertriglyceridemia in males
Source: bioRxiv or medRxiv preprint supplement (doi:10.1101/2021.02.02.429227), 2021-02-02
Supplement: Supplementary file [file media-4.pdf]

|                                                    | male serum |                              | female serum |                              |
|----------------------------------------------------|------------|------------------------------|--------------|------------------------------|
|                                                    | WT         | <i>Akr1d1</i> <sup>-/-</sup> | WT           | <i>Akr1d1</i> <sup>-/-</sup> |
| <b>monoacylglycerols</b>                           |            |                              |              |                              |
| 1-myristoylglycerol (14:0)                         | 0.86±0.057 | 1.1±0.071                    | 1.1±0.11     | 1.1±0.24                     |
| 1-pentadecanoylglycerol (15:0)                     | 1.1±0.099  | 1.2±0.081                    | 1.0±0.095    | 1.2±0.26                     |
| 1-palmitoylglycerol (16:0)                         | 0.98±0.12  | 1.2±0.093                    | 1.0±0.13     | 1.3±0.29                     |
| 1-palmitoleoylglycerol (16:1)*                     | 1.3±0.19   | 2.2±0.22*                    | 0.63±0.069   | 0.59±0.098                   |
| 1-oleoylglycerol (18:1)                            | 1.0±0.16   | 1.4±0.13*                    | 0.75±0.061   | 0.78±0.082                   |
| 1-linoleoylglycerol (18:2)                         | 1.0±0.092  | 1.6±0.19*                    | 0.94±0.078   | 0.88±0.16                    |
| 1-linolenoylglycerol (18:3)                        | 0.99±0.098 | 1.4±0.14                     | 0.98±0.11    | 0.97±0.23                    |
| 1-dihomo-linolenoylglycerol (20:3)                 | 1.2±0.24   | 1.6±0.14*                    | 0.76±0.071   | 0.75±0.10                    |
| 1-arachidonoylglycerol (20:4)                      | 1.3±0.17   | 1.4±0.14                     | 0.91±0.079   | 1.0±0.15                     |
| 1-docosahexaenoylglycerol (22:6)                   | 1.4±0.31   | 1.7±0.22                     | 0.85±0.12    | 0.66±0.12                    |
| 2-palmitoylglycerol (16:0)                         | 1.0±0.12   | 1.4±0.34                     | 1.1±0.11     | 1.2±0.25                     |
| 2-palmitoleoylglycerol (16:1)*                     | 1.3±0.18   | 2.0±0.20                     | 0.61±0.068   | 0.57±0.092                   |
| 2-oleoylglycerol (18:1)                            | 1.1±0.23   | 1.5±0.14*                    | 0.77±0.084   | 0.84±0.13                    |
| 2-linoleoylglycerol (18:2)                         | 1.0±0.083  | 1.5±0.19*                    | 0.92±0.073   | 0.84±0.14                    |
| 2-arachidonoylglycerol (20:4)                      | 1.0±0.17   | 1.2±0.24                     | 0.71±0.13    | 0.76±0.085                   |
| 2-docosahexaenoylglycerol (22:6)*                  | 1.4±0.33   | 1.4±0.27                     | 0.8±0.16     | 0.76±0.085                   |
| 1-dihomo-linoleoylglycerol (20:2)                  | 1.2±0.13   | 1.7±0.19                     | 0.81±0.077   | 0.84±0.11                    |
| <b>diacylglycerols</b>                             |            |                              |              |                              |
| diacylglycerol (16:1/18:2 [2], 16:0/18:3 [1])      | 1.1±0.29   | 1.6±0.28                     | 0.33±0.67    | 0.35±0.12                    |
| palmitoyl-oleoyl-glycerol (16:0/18:1) [2]          | 0.80±0.19  | 1.4±0.22*                    | 0.28±0.033   | 0.35±0.092                   |
| palmitoyl-linoleoyl-glycerol (16:0/18:2) [1]       | 1.6±0.23   | 1.7±0.27                     | 0.75±0.096   | 0.53±0.10                    |
| palmitoyl-linoleoyl-glycerol (16:0/18:2) [2]       | 1.1±0.22   | 1.7±0.32                     | 0.62±0.096   | 0.56±0.18                    |
| palmitoleoyl-linoleoyl-glycerol (16:1/18:2) [1]    | 1.4±0.19   | 2.9±0.31 <sup>‡</sup>        | 0.59±0.064   | 0.49±0.071                   |
| palmitoyl-arachidonoyl-glycerol (16:0/20:4) [1]    | 1.1±0.24   | 1.1±0.22                     | 0.56±0.074   | 0.54±0.13                    |
| oleoyl-oleoyl-glycerol (18:1/18:1) [1]             | 0.79±0.16  | 1.8±0.32**                   | 0.55±0.1     | 0.62±0.12                    |
| oleoyl-oleoyl-glycerol (18:1/18:1) [2]             | 1.2±0.22   | 2.2±0.37*                    | 0.7±0.13     | 0.73±0.11                    |
| oleoyl-linoleoyl-glycerol (18:1/18:2) [1]          | 1.2±0.16   | 1.7±0.15**                   | 0.78±0.066   | 0.6±0.087                    |
| oleoyl-linoleoyl-glycerol (18:1/18:2) [2]          | 1.0±0.14   | 1.9±0.16**                   | 0.77±0.058   | 0.64±0.12                    |
| linoleoyl-linoleoyl-glycerol (18:2/18:2) [1]       | 1.2±0.20   | 1.7±0.12                     | 0.72±0.10    | 0.64±0.13                    |
| linoleoyl-linolenoyl-glycerol (18:2/18:3) [1]      | 0.77±0.19  | 0.72±0.13                    | 0.87±0.10    | 0.58±0.11                    |
| oleoyl-arachidonoyl-glycerol (18:1/20:4) [2]       | 1.1±0.20   | 1.4±0.21                     | 0.58±0.087   | 0.82±0.15                    |
| linoleoyl-arachidonoyl-glycerol (18:2/20:4) [1]    | 1.2±0.21   | 1.6±0.26                     | 0.8±0.10     | 0.81±0.16                    |
| linoleoyl-arachidonoyl-glycerol (18:2/20:4) [2]    | 1.0±0.15   | 1.6±0.21*                    | 0.68±0.082   | 0.83±0.15                    |
| linoleoyl-docosahexaenoyl-glycerol (18:2/22:6) [1] | 1.3±0.34   | 1.7±0.41                     | 1.0±0.15     | 0.79±0.22                    |
| <b>polyunsaturated fatty acids</b>                 |            |                              |              |                              |
| myristate (14:0)                                   | 1.0±0.095  | 1.4±0.12*                    | 1.0±0.11     | 0.89±0.11                    |
| myristoleate (14:1n5)                              | 1.1±0.22   | 1.5±0.21                     | 0.89±0.15    | 0.83±0.14                    |
| pentadecanoate (15:0)                              | 1.0±0.064  | 1.2±0.10                     | 1.1±0.085    | 1.1±0.2                      |
| palmitate (16:0)                                   | 0.98±0.037 | 1.2±0.067*                   | 0.99±0.073   | 0.85±0.11                    |
| palmitoleate (16:1n7)                              | 1.1±0.10   | 1.7±0.17*                    | 0.87±0.11    | 0.72±0.072                   |
| margarate (17:0)                                   | 0.99±0.037 | 1.1±0.067                    | 1.1±0.099    | 0.96±0.14                    |
| 10-heptadecenoate (17:1n7)                         | 1.0±0.043  | 1.4±0.089*                   | 1.1±0.13     | 0.81±0.059                   |
| stearate (18:0)                                    | 0.97±0.026 | 1.1±0.07                     | 1.1±0.069    | 1.1±0.17                     |
| oleate/vaccenate (18:1)                            | 0.95±0.076 | 1.3±0.095*                   | 1.1±0.11     | 0.95±0.08                    |
| nonadecanoate (19:0)                               | 1.2±0.065  | 0.96±0.099                   | 0.82±0.078   | 0.64±0.094*                  |
| 10-nonadecenoate (19:1n9)                          | 1.0±0.047  | 1.4±0.11*                    | 1.1±0.12     | 0.79±0.073*                  |
| arachidate (20:0)                                  | 1.1±0.063  | 1.5±0.099*                   | 0.72±0.05    | 0.69±0.11                    |
| eicosenoate (20:1)                                 | 1.3±0.13   | 1.7±0.14*                    | 0.79±0.075   | 0.64±0.12                    |
| behenate (22:0)                                    | 1.9±0.57   | 2.1±0.51                     | 1.2±0.33     | 1.9±0.55                     |

|                                            |            |                       |            |              |
|--------------------------------------------|------------|-----------------------|------------|--------------|
| erucate (22:1n9)                           | 1.6±0.22   | 2.4±0.22*             | 0.5±0.05   | 0.48±0.13    |
| <b>polyunsaturated fatty acids</b>         |            |                       |            |              |
| heneicosapentaenoate (21:5n3)              | 0.86±0.20  | 1.1±0.29              | 0.48±0.072 | 0.5±0.092    |
| hexadecadienoate (16:2n6)                  | 1.0±0.11   | 1.5±0.15*             | 0.94±0.11  | 0.81±0.059   |
| stearidonate (18:4n3)                      | 0.85±0.07  | 2.0±0.37*             | 1.0±0.092  | 0.84±0.068   |
| eicosapentaenoate (EPA; 20:5n3)            | 0.98±0.096 | 1.4±0.15              | 1.1±0.096  | 0.83±0.087   |
| docosapentaenoate (n3 DPA; 22:5n3)         | 1.2±0.14   | 1.7±0.23*             | 0.88±0.068 | 0.75±0.066   |
| docosahexaenoate (DHA; 22:6n3)             | 0.96±0.13  | 1.1±0.12              | 1.1±0.073  | 0.88±0.10    |
| docosatrienoate (22:3n3)                   | 1.4±0.092  | 2.4±0.25 <sup>ϕ</sup> | 0.8±0.067  | 0.53±0.048** |
| nisinate (24:6n3)                          | 1.1±0.11   | 1.8±0.26**            | 0.94±0.077 | 0.63±0.064*  |
| linoleate (18:2n6)                         | 0.98±0.065 | 1.3±0.095             | 1.1±0.14   | 0.92±0.072   |
| linolenate [alpha or gamma; (18:3n3 or 6)] | 1.0±0.13   | 1.3±0.098             | 1.2±0.15   | 0.96±0.11    |
| dihomo-linolenate (20:3n3 or n6)           | 1.1±0.099  | 1.3±0.12              | 1.1±0.098  | 0.79±0.053*  |
| arachidonate (20:4n6)                      | 0.93±0.089 | 0.90±0.068            | 1.1±0.059  | 1.0±0.096    |
| adrenate (22:4n6)                          | 1.2±0.20   | 1.2±0.12              | 0.95±0.052 | 0.9±0.057    |
| docosapentaenoate (n6 DPA; 22:5n6)         | 1.2±0.14   | 1.1±0.12              | 0.96±0.073 | 0.89±0.061   |
| docosadienoate (22:2n6)                    | 1.3±0.074  | 1.4±0.21 <sup>ϕ</sup> | 0.64±0.053 | 0.87±0.071   |
| dihomo-linoleate (20:2n6)                  | 1.1±0.075  | 1.4±0.11*             | 1.0±0.094  | 0.79±0.045*  |
| mead acid (20:3n9)                         | 1.1±0.19   | 1.0±0.12              | 1.1±0.11   | 1.1±0.076    |
