# Supplementary material for: Akr1d1-/- mice have a sexually dimorphic metabolic phenotype with reduced fat mass, increased insulin sensitivity and hypertriglyceridemia in males
Source: bioRxiv or medRxiv preprint supplement (doi:10.1101/2021.02.02.429227), 2021-02-02
Supplement: Supplementary file [file media-5.pdf]

|                  | liver (pmol/mg) |                              | serum (nM) |                              |
|------------------|-----------------|------------------------------|------------|------------------------------|
|                  | WT              | <i>Akr1d1</i> <sup>-/-</sup> | WT         | <i>Akr1d1</i> <sup>-/-</sup> |
| CA               | 1.95±0.43       | 0.17±0.09**                  | 578±147    | 43.5±16.9                    |
| T-CA             | 80.3±8.5        | 17.2±10.6***                 | 115±16.5   | ND                           |
| G-CA             | 0.34±0.06       | 0.09±0.06                    | ND         | ND                           |
| CDCA             | 0.14±0.02       | 0.01±0.01***                 | 36.4±8.3   | 16.1±0.4                     |
| T-CDCA           | 6.78±0.53       | 1.43±0.73***                 | 35.6±9.5   | 0.49±0.47                    |
| G-CDCA           | ND              | ND                           | 10.2±1.4   | 8.06±0.20                    |
| α-MCA            | 0.53±0.9        | 0.08±0.05***                 | 25.3±9.81  | ND                           |
| T-α-MCA          | 17.1±1.35       | 4.17±1.90**                  | 172±52.4   | 11.0±4.15                    |
| β-MCA            | 2.56±0.36       | 0.78±0.23**                  | 76.0±28.0  | 12.5±5.7                     |
| T-β-MCA          | 38.3±3.9        | 13.8±4.3***                  | 221±67     | 15.7±2.7                     |
| ω-MCA            | 0.56±0.10       | 0.13±0.03**                  | 94.5±34.9  | 9.82±3.38                    |
| T-ω-MCA          | 30.0±3.4        | 9.18±2.24 <sup>‡</sup>       | 497±103    | 62.4±11.7                    |
| DCA              | 0.21±0.05       | ND**                         | 404±95     | 21.0±5.9                     |
| T-DCA            | 9.06±1.31       | 0.97±0.38**                  | 76.3±13.4  | 2.95±1.44                    |
| LCA              | ND              | ND                           | 79.3±8.9   | 72.2±5.5                     |
| T-LCA            | 1.18±0.07       | 0.53±0.14***                 | 1.00±0.18  | ND                           |
| G-LCA            | ND              | ND                           | ND         | ND                           |
| UDCA             | 0.15±0.04       | 0.07±0.04                    | 59.5±14.9  | 16.7±1.7                     |
| T-UDCA           | 4.97±0.58       | 2.69±0.62                    | 71.3±13.4  | 17.0±3.1                     |
| G-UDCA           | ND              | ND                           | 5.92±0.22  | 5.53±0.22                    |
| HDCA             | 0.34±0.06       | 0.58±0.14                    | 39.7±8.3   | 16.1±0.4                     |
| 7-oxo-DCA        | ND              | ND                           | 18.2±13.4  | 26.0±12.4                    |
| T-7-oxo-LCA      | 0.04±0.01       | ND*                          | ND         | ND                           |
| 12α-hydroxyl     | 91.8±10.4       | 18.5±11.1**                  | 1815±434   | 67.5±24.0                    |
| non-12α-hydroxyl | 103±10          | 33.4±10.4**                  | 1443±299   | 298±59                       |
